# Supplementary material
Source: PubMed Central journal article supplement (PMC6293100)

**Fig. S1.** Time course mortality of L3 larvae exposed to Indole (A), Linalool (B), and Hexenyl acetate (C) and the SeMNPV. Final mortality values are reported in Fig. 1.

**Fig. S2.** Time course mortality and calculated mean time to death of L3 larvae exposed to indole at a concentration of SeMNPV producing about 80% mortality. In A) and B), insects were exposed to the indole by placing 4 mg of indole in 0.2 ml tube punched with a G25 needle in their lid into the rearing well. In C) and D), insects were exposed to a continuous rate of indole (a.50 ng /h) using a volatile dispenser. \* refers to P-value<0.01

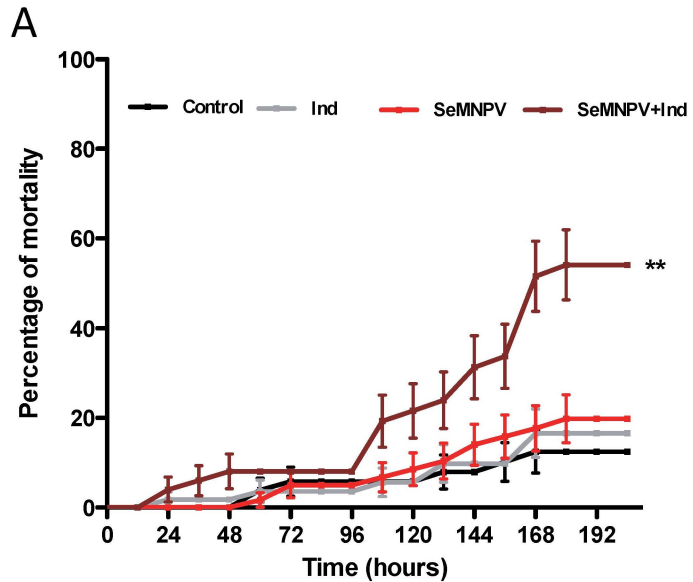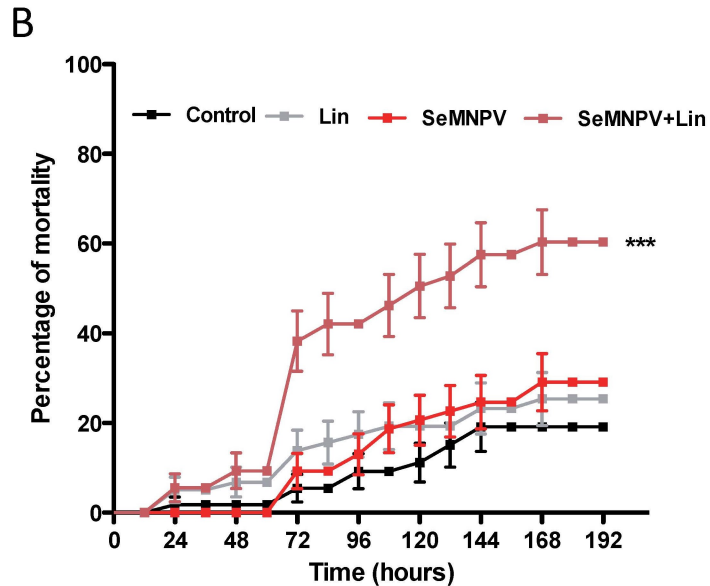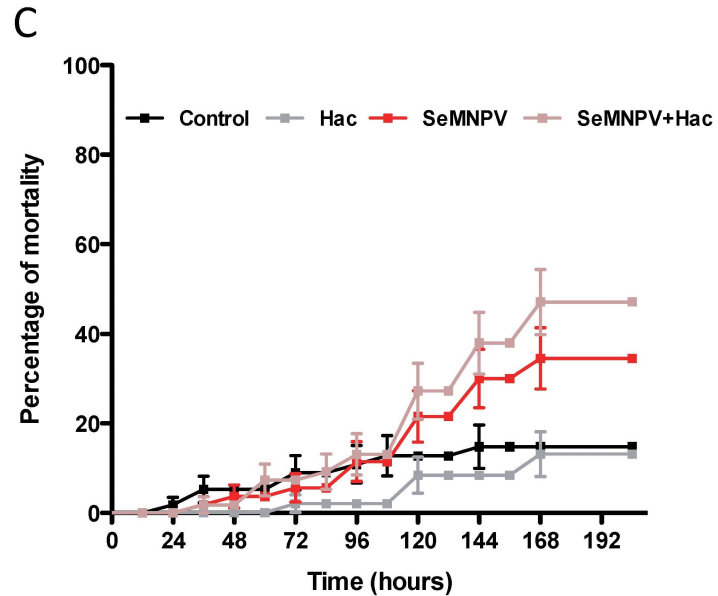

A

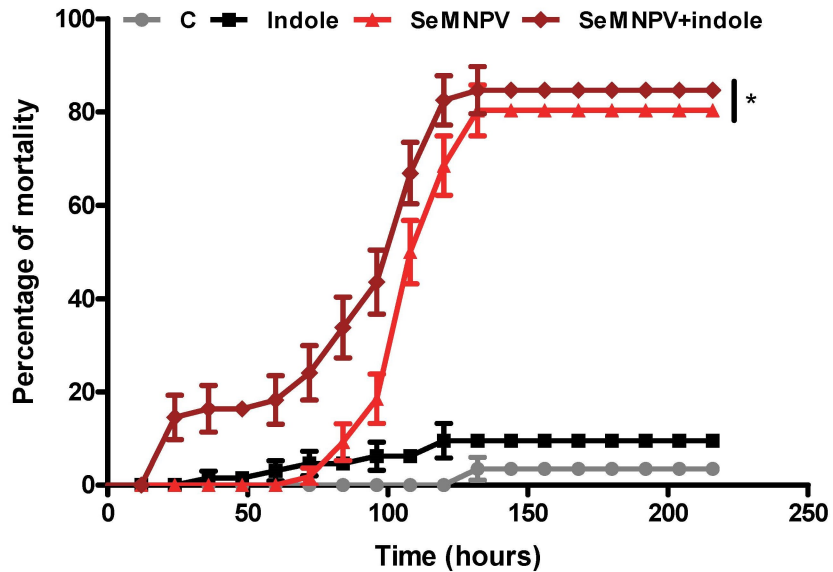

B

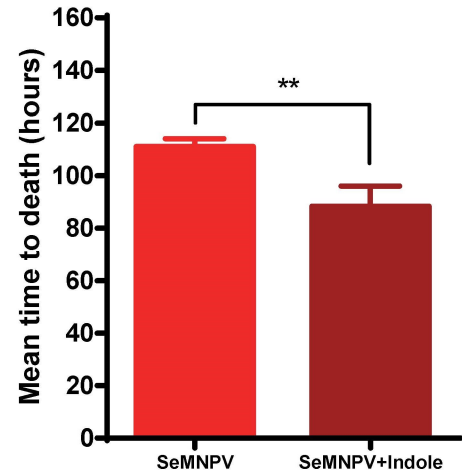

C

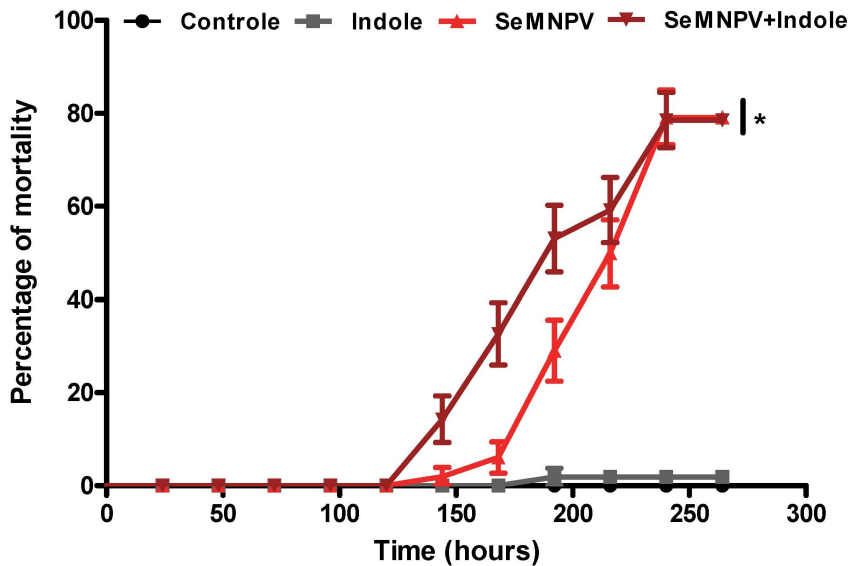

D

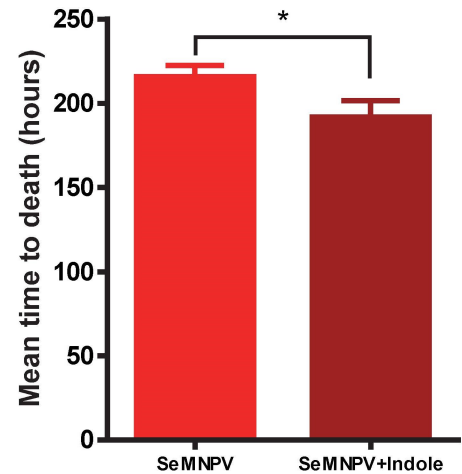

Supplement: AEM.01468-18-s0001.pdf [file AEM.01468-18-s0001.pdf]
